1     **Genes encoding teleost orthologs of human haplo-insufficient**  
2     **and monoallelic genes remain in duplicate more frequently than**  
3                     **the whole genome**

4  
5     Floriane Picolo<sup>1</sup>, Anna Grandchamp<sup>1</sup>, Benoît Piégu<sup>1</sup>, Reiner A. Veitia<sup>2,3,4</sup>, Philippe Monget<sup>1</sup>

6  
7     **Correspondance**

8     <sup>1</sup> PRC, UMR85, INRAE, CNRS, IFCE, Université de Tours, F-37380 Nouzilly, France

9     <sup>2</sup> Université de Paris, F-75006, Paris, France.

10    <sup>3</sup> Université de Paris, CNRS, Institut Jacques Monod, F-75006, Paris, France.

11    <sup>4</sup> Université Paris-Saclay, Institut de Biologie F. Jacob, Commissariat à l’Energie Atomique,  
12    Fontenay aux Roses, France.

13

14    **Classification**

15    Biological sciences, Evolution

16

17    **Corresponding author**

18    [philippe.monget@inrae.fr](mailto:philippe.monget@inrae.fr)

19

20

21    **Study Funding**

22    The present study was supported by a fellowship from the French Ministry of Research and by  
23    the Institut National de Recherche pour l’Agriculture, l’Alimentation et l’Environnement  
24    (INRAE).

25

26    **Keywords**

27    Haploinsufficient genes, monoallelic genes, phylogeny, whole-genome-duplication, duplicat,  
28    singleton

29

30

## 31 Abstract

32 Gene dosage is important is an important issue both in cell and evolutionary biology. Most genes  
33 are present in two copies in eukaryotic cells. The first outstanding exception is monoallelic gene  
34 expression (MA) that concerns genes localized on the X chromosome or in regions undergoing  
35 parental imprinting in eutherians, and many other genes scattered throughout the genome. The  
36 second exception concerns haploinsufficiency (HI), responsible for the fact that a single func-  
37 tional copy of a gene in a diploid organism is insufficient to ensure a normal biological function.  
38 One of the most important mechanisms ensuring functional innovation during evolution is Whole  
39 genome duplication (WGD). In addition to the two WGDs that have occurred in vertebrate ge-  
40 nomes, the teleost genomes underwent an additional WGD, after their divergence from tetrapod.  
41 In the present work, we have studied on 57 teleost species whether the orthologs of human MA  
42 or HI genes remain more frequently in duplicates or returned more frequently in singleton than  
43 the rest of the genome. Our results show that the teleost orthologs of HI human genes remained  
44 more frequently in duplicate than the rest of the genome in all the teleost species studied. No  
45 signal was observed for the orthologs of genes localized on the human X chromosome or sub-  
46 jected to parental imprinting. Surprisingly, the teleost orthologs of the other human MA genes  
47 remained in duplicate more frequently than the rest of the genome for most teleost species. These  
48 results suggest that the teleost orthologs of MA and HI human genes also undergo selective pres-  
49 sures either related to absolute protein amounts and/or of dosage balance issues. However, these  
50 constraints seem to be different for MA genes in teleost in comparison with human genomes.

## 51 Introduction

52 Gene dosage effects are an important phenomenon in cell biology that has evolutionary conse-  
53 quences. Indeed, in eukaryote cells, most genes are present in two copies that are transcribed and  
54 produce functional proteins. However, there are exceptions. The first outstanding exception is  
55 the case of monoallelic gene expression (MA). This is so for the majority of genes that are pre-  
56 sent on the X chromosome of eutherian mammals, genes that present a parental imprinting in  
57 eutherians, and genes encoding immunoglobulins and olfactory receptors (Chess et al., 2016).  
58 Monoallelic expression of genes is under an epigenetic control that is not well understood. For  
59 these genes, dysregulation of the mechanism(s) underlying monoallelic expression can lead to  
60 expression of both alleles, and to overexpression of the corresponding protein, and thus to severe  
61 pathologies (Horsthemke 2010). The second exception concerns haploinsufficiency. Haploinsuf-  
62 ficiency is a biological phenomenon responsible for the fact that a single functional copy of a  
63 gene in a diploid organism is insufficient to ensure a normal biological function. Haploinsuffi-  
64 ciency is detected more frequently in essential genes than in nonessential genes in yeast (Ohnuki  
65 & Ohya, 2018). Two non-mutually exclusive theories have been proposed to explain the cause of  
66 haploinsufficiency: the “insufficient amounts” hypothesis and the gene dosage balance hypothe-  
67 sis (GDBH). The “insufficient amounts” hypothesis states that haploinsufficiency is the conse-  
68 quence of a reduced protein amount due to the loss of function of one allele, this amount being  
69 insufficient to ensure its biological function (Deutschbauer et al., 2005). This hypothesis does not  
70 explain why haploinsufficiency persisted over evolutionary time. The GDBH suggests that the

71 phenotype caused by changes of protein level in a biological process is due to stoichiometric  
72 imbalances of protein complexes involved in cellular functions (Veitia, 2002; Papp et al., 2003).  
73 This hypothesis predicts that haplo-insufficient genes confer a biological defect when the amount  
74 of proteins is halved (such as A in a complex A-B-A) but also in excess in particular cases (such  
75 as B in the same complex (Veitia, 2002). In contrast to the “insufficient amounts” hypothesis,  
76 this hypothesis proposes an elegant explanation of the conservation of haploinsufficiency during  
77 evolution.

78  
79 One of the most important mechanism ensuring functional innovation during evolution is gene  
80 duplication or the duplication of entire genome (Ohno et al., 1964; Hideki & Kondrashov, 2010).  
81 Whole genome duplication (WGD) events have been observed in all taxonomic groups: bacteria  
82 (Kuroda et al, 2001), unicellular eukaryotes (Manolis et al., 2004) and in plants (Adams et al,  
83 2005). In vertebrates, there have been two rounds of duplication of the ancestral deuterostome  
84 genome (Mable et al., 2011). One of the striking features that characterize the teleost genomes is  
85 that they underwent an additional WGD, also called the teleost-specific genome duplication  
86 (TGD), after divergence from tetrapods (Glasauer & Neuhauss, 2014). This specific WGD event  
87 provided important additional genetic material, which strongly contributed to the radiation of  
88 teleost fishes (Ravi et al., 2008). Teleosts constitute a monophyletic group of ray finned fishes,  
89 and is the widest and most diverse group of vertebrates (Robinson-Rechavi et al., 2001; Taylor et  
90 al., 2003; Taylor & Raes, 2014; Christoffels et al., 2004). The high diversity of fish species com-  
91 bined with a recent complete duplication makes Clupeocephala a group of great interest for the  
92 study of complete genome duplication in the animal kingdom.

93  
94 Unlike single-gene duplication events, a WGD provides all at once a large number of new genet-  
95 ic material, promoting an increased inter- and intra-specific diversity (Van de Peer et al, 2009,  
96 2017). Interestingly, after WGD, all genes do not remain in duplicate with the same probability.  
97 Most models predict a rapid return of part of the duplicates to a singleton state (Maere et al,  
98 2005), the extra-copies being rapidly pseudogenized (Sankoff et al, 2010). In particular for the  
99 rainbow trout, whose genome has duplicated one more time than that of the teleost about 100 my  
100 ago, it is estimated that about 48% of the genome remained in duplicate, when the remaining 52%  
101 of the genome quickly returned to a singleton state (Berthelot et al, 2014).

102 Understanding the rules explaining why certain genes remain in duplicate when others return to  
103 singleton is a challenging issue. It has been shown that certain families of genes are more likely  
104 to remain as duplicates in all taxonomic groups studied. This is the case for transcription factors,  
105 protein kinases, enzymes and transporters (Conant et al., 2008). Recently, we showed that this is  
106 also the case for genes encoding membrane receptors and their ligands (Grandchamp et al.,  
107 2019). The first explanation that has been put forward to explain the fact that genes are more  
108 often kept in duplicate is that these molecules are involved in key functions common to all or-  
109 ganisms. Their quantitative increase would favor these key functions because of an increase in  
110 the number of molecules produced (selection for an absolute dosage increase), and/or because of  
111 a compensation of a potential loss of function mutation of one of both copies. Another explana-  
112 tion is based on the respect of gene dosage balance. This is particularly so for proteins whose  
113 function is heavily dependent on interactions with partners.

114  
115 In the present work, we have studied on 57 teleost species whether the orthologs of human genes

116 known to present a monoallelic (MA) expression or to be haplo-insufficient (HI) in human re-  
117 main more frequently in duplicates or returned more frequently in singleton than the whole ge-  
118 nome in fish species or not.

## 119 Results and Discussion

120 There is a mean number of 13882 human genes on 22836 (60.8%) that possess at least one  
121 ortholog in at least one teleost genome. Among them, an average of 9854 (range from 3530 to  
122 10868) have returned in singleton, an average of 3135 (range from 2323 to 7066) remained in  
123 duplicate, and an average of 893 (range from 337 to 4772) that are in triplicate or more copies.

124 Concerning the 312 human HI genes, 299 (95.8%) possessed at least one ortholog in at least one  
125 teleost genome. Among them, an average of 172 (range from 47 to 199 depending on the studied  
126 species) have returned in singleton, an average of 85 (range from 68 to 122 depending on the  
127 species) remained in duplicate, and an average of 19 (range from 3 to 140) that are in triplicate or  
128 more copies. A total of 285 genes remained in duplicate (or more) in at least one species among  
129 the 57 teleost species studied. In comparison with the whole genome, this higher percentage of  
130 genes returned to singleton and remained in duplicate or more is significantly different for 55  
131 species out of 57 (Chi Square analysis, p-value range from 0.058 to 4.2E-6), and for the 57 spe-  
132 cies studied (according to a hypergeometric test, p-value range from 0.034 to 8.5E-6). Moreover,  
133 in comparison with the whole genome as well, the higher percentage of genes that are in tripli-  
134 cate or more copies is significantly higher in the genomes of Rainbow trout, Brown trout, Atlan-  
135 tic salmon, Huchen, and Common Carp (p-value range from 1.3E-8 to 8.1E-4) but not in the ge-  
136 nome of the other teleosts. These results suggest that the teleost orthologs of HI human genes are  
137 also subjected to selective pressures either related to absolute protein amounts and/or of dosage  
138 balance issues. This suggests that HI genes in humans undergo similar constraints in in teleosts.

139 Among the 285 genes that remained in duplicate in at least one teleost species, 76 genes re-  
140 mained in duplicate or more in at least 80% (45) of species. These genes encode more (from 3 to  
141 38 more times) transcription factors than the whole genome: bHLH transcription factor binding  
142 (GO:0043425); RNA polymerase II activating transcription factor binding (GO:0001102); acti-  
143 vating transcription factor binding (GO:0033613); transcription factor binding (GO:0008134);  
144 DNA-binding transcription factor binding (GO:0140297); DNA-binding transcription factor ac-  
145 tivity, RNA polymerase II-specific (GO:0000981); DNA-binding transcription factor activity  
146 (GO:0003700). This enrichment of GO is completely in accordance with the GO of HI genes  
147 previously reported (Veitia, 2002). There was no particularly representative GO among the genes  
148 in triplicate in the genome of teleost species. These results are compatible with both direct insuf-  
149 ficiency of a transcription factor as well as with balance issues (as they are often multi-subunit  
150 complexes). Threshold effects can also be at play because of the strongly nonlinear relationships  
151 (sigmoidal or S-shaped) produced by the cooperative binding of a transcription factor to a cis  
152 regulatory sequence and the transcriptional response. Thus, depending on the concentration of  
153 transcription factor a halved dosage may not be sufficient to cross the threshold required for a  
154 normal transcriptional response (Veitia, 2002).

155 Concerning the 206 X human chromosome genes, 176 (82,6%) possessed at least one ortholog in  
156 at least one teleost genome. Among them, an average of 116 (range from 32 to 132 depending on  
157 the studied species) have returned in singleton, an average of 35 (range from 23 to 79 depending

158 on the species) remained in duplicate, and an average of 7 (range from 0 to 54) that are in tripli-  
159 cate or more copies. Concerning the 90 genetic imprinting genes, 51 (56,7%) possessed at least  
160 one ortholog in at least one teleost genome. Among them, an average of 35 (range from 12 to 41  
161 depending on the studied species) have returned in singleton, an average of 8 (range from 3 to 23  
162 depending on the species) remained in duplicate, and an average of 3 (range from 0 to 20) that  
163 are in triplicate or more copies. So the teleost orthologs of human genes subjected to genetic im-  
164 printing or located on X human chromosome returned to singleton or remained in duplicate (or  
165 remain present as triplicates or more copies), in the same proportions than the whole genome.

166  
167 Concerning the 580 human MA genes that are not localized on the X chromosome and that are  
168 not subjected to parental imprinting, 469 (80,9%) had at least one ortholog in at least one teleost  
169 genome. Among them, an average of 265 (range from 87 to 296) have returned to singleton, an  
170 average of 118 (range from 87 to 193) remained in duplicate, and an average of 26 (range from 4  
171 to 160) that were found in triplicate or more copies. A total of 437 genes remained in duplicate in  
172 at least one species among the 57 teleost species studied. In comparison with the whole genome,  
173 the difference of percentage of genes remained in duplicate or more is significantly higher for 47  
174 species on 57 (Chi Square analysis, p-value range from 0.055 to 6.5E-4), and for 50 species on  
175 57 (hypergeometric test, p-value range from 0.044 to 6.2E-4). Moreover, in comparison with the  
176 whole genome as well, the difference of percentage of genes that are in triplicate or more copies  
177 is significantly higher in the genomes of Rainbow trout, Brown trout, Atlantic salmon, Huchen,  
178 and Common Carp (p-value range from 0,056 to 5.3E-3), not in the genome of the other teleosts.  
179 We found this result surprising. Indeed, one would have hypothesized that the teleost orthologs  
180 of MA human genes returned more frequently to singleton than the whole genome. This suggests  
181 that the phenomenon that the regulation -of epigenetic mechanism- of monoallelic expression is  
182 not likely to occur for these genes in teleosts. Moreover, this suggests that the constraints to ex-  
183 press only one allele in the human does not exist for these genes in teleost. Unlike the HI genes,  
184 there is no particularly representative GO among the MA genes.

185  
186

## 187 Material and methods

188 We studied 57 species of fish:

189 Amazon molly (*Poecilia formosa*), Atlantic herring (*Clupea harengus*), Atlantic salmon (*Salmo*  
190 *salar*), Ballan wrasse (*Labrus bergylta*), Barramundi perch (*Lates calcarifer*), Blue tilapia (*Oreo-*  
191 *chromis aureus*), Blunt-snouted clingfish (*Gouania willdenowi*), Brown trout (*Salmo trutta*), Bur-  
192 ton's mouthbrooder (*Haplochromis burtoni*), Channel bull blenny (*Cottoperca gobio*), Channel  
193 catfish (*Ictalurus punctatus*), Climbing perch (*Anabas testudineus*) Cod (*Gadus morhua*), Com-  
194 mon carp (*Cyprinus carpio common\_carp\_genome*), Denticle herring (*Denticeps clupeoides*),  
195 Eastern happy (*Astatotilapia calliptera*), Electric eel (*Electrophorus electricus*), European seabass  
196 (*Dicentrarchus labrax*), Fugu (*Takifugu rubripes*), Gilthead seabream (*Sparus aurata*), Greater  
197 amberjack (*Seriola dumerili*), Guppy (*Poecilia reticulata*), Huchen (*Hucho hucho*), Indian glassy  
198 fish (*Parambassis ranga*), Indian medaka (*Oryzias melastigma*), Japanese medaka HdrR (*Oryzias*  
199 *latipes* ASM223467v1), Japanese medaka HNI (*Oryzias latipes* ASM223471v1), Japanese meda-  
200 ka HSOK (*Oryzias latipes* ASM223469v1), Jewelled blenny (*Salarias fasciatus*), Large yellow  
201 croaker (*Larimichthys crocea*), Live sharksucker (*Echeneis naucrates*), Lyretail cichlid (*Neo-*



202 lamprologus brichardi), Makobe Island cichlid (*Pundamilia nyererei*), Mexican tetra (*Astyanax*  
203 *mexicanus* *Astyanax\_mexicanus*-2.0), Midas cichlid (*Amphilophus citrinellus*), Mummichog  
204 (*Fundulus heteroclitus*), Nile tilapia (*Oreochromis niloticus*), Northern pike (*Esox lucius*), Or-  
205 biculate cardinalfish (*Sphaeramia orbicularis*), Pachon cavefish (*Astyanax mexicanus* *Asty-*  
206 *nax\_mexicanus*-1.0.2), Pinecone soldierfish (*Myripristis murdjan*), Rainbow trout (*Oncorhyn-*  
207 *chus mykiss*), Red-bellied piranha (*Pygocentrus nattereri*), Sailfin molly (*Poecilia latipinna*),  
208 Sheepshead minnow (*Cyprinodon variegatus*), Shortfin molly (*Poecilia mexicana*), Siamese  
209 fighting fish (*Betta splendens*), Stickleback (*Gasterosteus aculeatus*), Swamp eel (*Monopterus*  
210 *albus*), Tetraodon (*Tetraodon nigroviridis*), Tiger tail seahorse (*Hippocampus comes*), Tongue  
211 sole (*Cynoglossus semilaevis*), Turbot (*Scophthalmus maximus*), Yellowtail amberjack (*Seriola*  
212 *lalandi dorsalis*), Zebra mbuna (*Maylandia zebra*), Zebrafish (*Danio rerio*), Zig-zag eel (*Masta-*  
213 *cembelus armatus*).

214

215 These fish species diverged after complete TGD. The human genes were retrieved from EN-  
216 SEMBL. The ortholog copy for each gene was established in every one of the 57 fish species.  
217 Then, in each species, the fate (singleton vs duplicate) of the entirety of the human gene  
218 orthologs was studied. Moreover, a total of 312 human genes known to be haploinsufficient were  
219 recovered from ClinGene (<https://www.ncbi.nlm.nih.gov/projects/dbvar/clingen/>), 580 human  
220 genes known to be monoallelic (Nag et al., 2015), 206 X human chromosome genes was recov-  
221 ered for GeneImprint (<http://www.geneimprint.com/site/genes-by-species>) and 90 genetic im-  
222 printing genes (Carrel & Willard, 2005) and the fate of their fish orthologs was recovered. A list  
223 of human genes (GRCh38.p13) was generated using BioMart from Ensembl Genes 101. The set  
224 of human genes encoding a protein (protein\_coding) is selected from the gene type filter. The  
225 selected attributes in the homologous category are the different species of teleostens listed in  
226 ENSEMBL. Only stable gene IDs were selected. A list of 22836 human genes encoding a protein  
227 is listed.

228 We got between 12,918 (Tetraodon) and 14,626 (Brown trout) orthologous genes by fish species  
229 (average: 13,882). This does not represent the entire genome of each fish, but allowed us to make  
230 strong statistics. Moreover, we compared the global evolution of the whole human genome that  
231 had orthologs in fishes with the specific evolution of human MA and HI genes in fish species.  
232 We studied whether these fish orthologs of MA and HI genes remained as a duplicate copy, or  
233 had return to singleton in the same proportion as whole human ortholog genes.

234 Both Chi Square test statistical analysis and hypergeometric analysis with Benjamini-Hochberg  
235 correction were used to test the hypothesis that teleost genes that are orthologs of human MA and  
236 HI genes remained more in duplicate than the whole genome. All the statistical tests conducted in  
237 our study were performed in R. Moreover, the Panther DataBase (<http://www.pantherdb.org/>)  
238 was used to study the gene ontology of teleost genes that are orthologs to human HI genes, and  
239 Fisher test with Benjamini-Hochberg correction was used to classify genes according to the fami-  
240 ly.

241

## 242 Acknowledgements

243 This work was supported by INRAE institute and by a thesis scholarship funded by the Universi-  
244 ty of Tours (France). Thanks also to Alexandra Louis and Hugues Roest Crollius for helpful dis-

245 cussion and technical assistance.

246

247

248

## 249 References

250 Adams KL & Wendel JF 2005 Polyploidy and Genome Evolution in Plants. *Current opinion*  
251 *in plant biology* 8: 135–141

252 Berthelot, Camille et al. “The Rainbow Trout Genome Provides Novel Insights into Evolution  
253 after Whole-Genome Duplication in Vertebrates.” *Nature communications* 5 (2014): 3657.

254 Carrel L, Willard HF. X-inactivation profile reveals extensive variability in X-linked gene ex-  
255 pression in females. *Nature*. 2005 Mar 17;434(7031):400-4.

256 Chess A 2016 Monoallelic Gene Expression in Mammals. *Annual Review of Genetics* 50:  
257 317-327.

258 Christoffels, Alan et al. “Fugu Genome Analysis Provides Evidence for a Whole-Genome Du-  
259 plication Early during the Evolution of Ray-Finned Fishes.” *Molecular biology and evolu-*  
260 *tion* 21.6 (2004): 1146–1151.

261 Conant, Gavin C., and Kenneth H. Wolfe. “Turning a Hobby into a Job: How Duplicated  
262 Genes Find New Functions.” *Nature Reviews Genetics* 9.12 (2008): 938.

263 Deutschbauer AM, Jaramillo DF, Proctor M, Umm J, Hillenmeyer ME, Davis RW, Nislow C,  
264 Giaever G 2005 Mechanisms of haploinsufficiency revealed by genome-wide profiling in  
265 yeast. *Genetics* 169: 1915-1925

266 Glasauer, Stella MK, and Stephan CF Neuhauss. “Whole-Genome Duplication in Teleost  
267 Fishes and Its Evolutionary Consequences.” *Molecular genetics and genomics* 289.6  
268 (2014): 1045–1060.

269 Grandchamp A, Piégu B, Monget P 2019 Genes Encoding Teleost Fish Ligands and Associat-  
270 ed Receptors Remained in Duplicate More Frequently than the Rest of the Genome. *Ge-*  
271 *nome Biol Evol* 11:1451-1462

272 Horsthemke B 2010 Mechanisms of imprint dysregulation *American Journal of Medical Ge-*  
273 *netics*. Part C Sem Med Genet 153C: 321-328

274 Innan, Hideki, and Fyodor Kondrashov. “The Evolution of Gene Duplications: Classifying  
275 and Distinguishing between Models.” *Nature Reviews Genetics* 11.2 (2010): 97.

276 Kuroda M, Ohta T, Uchiyama I, Baba T, Yuzawa H, Kobayashi I, et al. 2001 Whole Genome  
277 Sequencing of Meticillin-Resistant *Staphylococcus Aureus*. *The Lancet* 357: 1225–1240.

278 Mable, BK, Alexandrou MA, Taylor MI 2011 “Genome Duplication in Amphibians and Fish:  
279 An Extended Synthesis.” *Journal of Zoology* 284.3 (2011): 151–182.

280 Maere, Steven et al. “Modeling Gene and Genome Duplications in Eukaryotes.” *Proceedings*

- 281 *of the National Academy of Sciences of the United States of America* 102.15 (2005): 5454–  
282 5459.
- 283 Manolis K, Birren BW, Lander ES 2004 Proof and Evolutionary Analysis of Ancient Genome  
284 Duplication in the Yeast *Saccharomyces Cerevisiae*. *Nature* 428: 617-624.
- 285 Nag A, Vigneau S, Savova V, Zwemer LM, Gimelbrant A 2015 Chromatin Signature Identi-  
286 fies Monoallelic Gene Expression Across Mammalian Cell Types. *G3: Genes, Genomes,*  
287 *Genetics* 5: 1713-1720
- 288 Ohno, Susumu, Ulrich Wolf, and Niels B. Atkin. “Evolution from Fish to Mammals by Gene  
289 Duplication.” *Hereditas* 59.1 (1968): 169–187.
- 290 Ohnuki S & Ohya Y 2018 High-dimensional single-cell phenotyping reveals extensive hap-  
291 loinsufficiency *PloS Biology* 16: e2005130
- 292 Papp B, Pal C, Hurst LD 2003 Dosage Sensitivity and the Evolution of Gene Families in  
293 Yeast. *Nature* 424: 194-197
- 294 Ravi, Vydianathan, and Byrappa Venkatesh. “Rapidly Evolving Fish Genomes and Teleost  
295 Diversity.” *Current opinion in genetics & development* 18.6 (2008): 544–550.
- 296 Robinson-Rechavi, Marc et al. “An Ancestral Whole-Genome Duplication May Not Have  
297 Been Responsible for the Abundance of Duplicated Fish Genes.” *Current Biology* 11.12  
298 (2001): R458–R459.
- 299 Sankoff, David, Chunfang Zheng, and Qian Zhu. “The Collapse of Gene Complement Fol-  
300 lowing Whole Genome Duplication.” *BMC genomics* 11.1 (2010): 313.
- 301 Taylor, John S. et al. “Genome Duplication, a Trait Shared by 22,000 Species of Ray-Finned  
302 Fish.” *Genome research* 13.3 (2003): 382–390.
- 303 Taylor, John S., and Jeroen Raes. “Duplication and Divergence: The Evolution of New Genes  
304 and Old Ideas.” *Annu. Rev. Genet.* 38 (2004): 615–643.
- 305 Van de Peer Yves, Steven Maere, and Axel Meyer. “The Evolutionary Significance of Ancient  
306 Genome Duplications.” *Nature Reviews Genetics* 10.10 (2009): 725.
- 307 Van de Peer, Yves, Eshchar Mizrachi, and Kathleen Marchal. “The Evolutionary Significance  
308 of Polyploidy.” *Nature Reviews Genetics* 18.7 (2017): 411.
- 309 Veitia R 2002 Exploring the etiology of haploinsufficiency. *BioEssays* 24: 175-184  
310  
311  
312  
313  
314



315

316

317

## 318 Legend figures

319 Figure 1 – Barplot of the global distribution of the genes in each category. Teleost orthologs of  
320 human genes localized on the X chromosome, of human haplo-insufficient (HI) genes, of human  
321 genes of monoallelic expression (MA, except genes that present a parental imprinting and local-  
322 ized on the X chromosome), of human genes that present a parental imprinting. Right: Teleost  
323 orthologs of human genes of the whole genome.

324 The yellow bars correspond to the genes that remained in duplicate; the blue bars correspond to  
325 the genes returned in singleton. The grey bars correspond to the genes in triplicate or more. The  
326 results are presented as mean  $\pm$  SEM. \* indicates a significant difference compared with the  
327 whole genome ( $p < 0.05$ ).

328

329 **Suppl Data 1** - Table of statistic tests for each species of teleost and for each category.

330 Each category (HI, MA, X Chromosome, Parental imprinting) have the same construction. By  
331 column (category HI for example): (A) Species; (B) Total number of teleost genes returned in  
332 singleton. (C) Total number of teleost genes remained in duplicate; (D) Total number of teleost  
333 genes in triplicate or more copies; (E) Total number of teleost genes with a human ortholog; (F)  
334 Number of teleost orthologs of HI human genes returned in singleton; (G) Number of teleost  
335 orthologs of HI human genes remained in duplicate; (G) Number of teleost orthologs of HI hu-  
336 man genes in triplicate or more copies; (I) Total number of teleost orthologs to human HI gene;  
337 (J) Chi2 value of the repartition of HI orthologs in singleton, in duplicate or more copies in com-  
338 parison with the whole genome; (K) P-value of Chi2 test; (L) Chi2 False Discovery Rate (FDR)  
339 by Benjamini Hochberg (BH) procedure. (M) P-value of hypergeometric test between singleton  
340 and duplicate/more copies. (N) Hypergeometric FDR by BH procedure. (O) P-value of hyperge-  
341 ometric test between triplicate or more copies and in duplicate or less copies. (P) Hypergeometric  
342 FDR by BH procedure.

343 The same organization of columns is used for the other categories (MA, X chromosome, im-  
344 printed genes).

345 Concerning for HI and MA categories, the chi2 test is significant for 55/57 and 47/57 species,  
346 respectively, and the hypergeometric test is significant for 57/57 and 50/57 species, respectively,  
347 i.e. these orthologs remain more frequently in duplicate than the whole genome. For comparison  
348 between triplicate (or more copies) and duplicate (or less copies), the hypergeometric test is sig-  
349 nificant for 5/57 (salmonids and carp) and 3/57 species respectively (salmonid and carp as well).

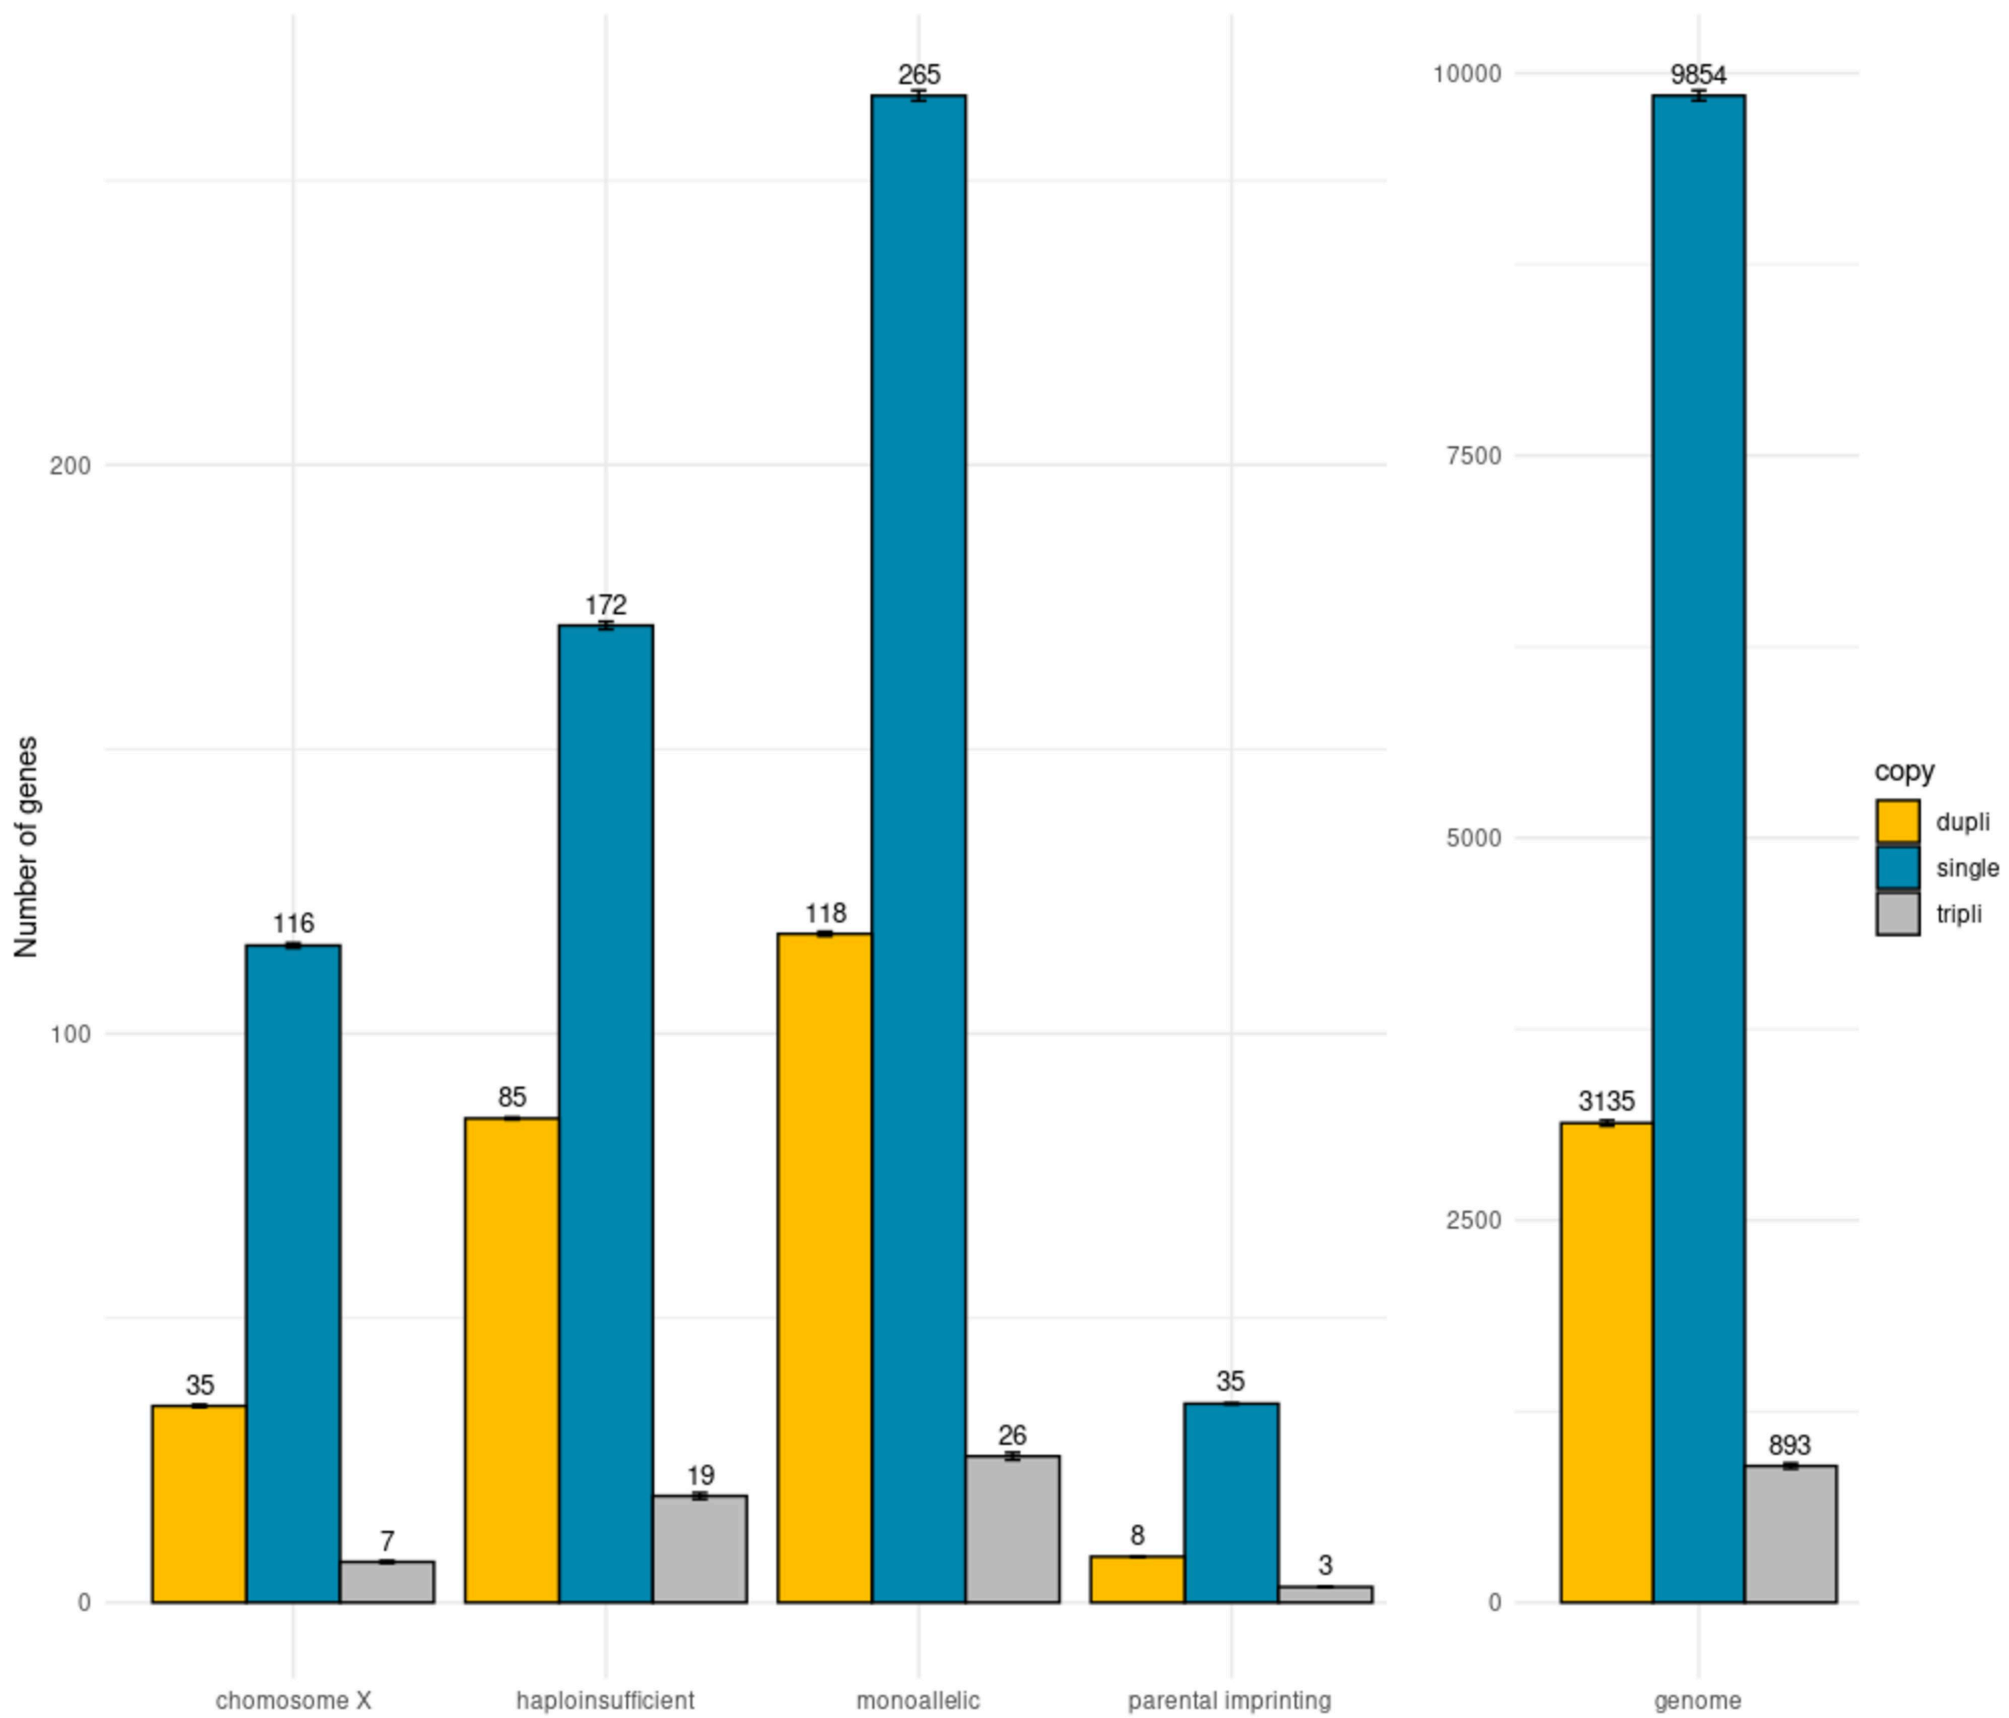

## Parental imprinting

| Species                 | Genome                      |                                |                                         |                       | Number of parental imprinting teleost orthologs returned in singleton |
|-------------------------|-----------------------------|--------------------------------|-----------------------------------------|-----------------------|-----------------------------------------------------------------------|
|                         | Number of single copy genes | Number of duplicate copy genes | Number of triplicate or more copy genes | Total number of genes |                                                                       |
| Amazon molly            | 10313                       | 2909                           | 712                                     | 13934                 | 40                                                                    |
| Atlantic herring        | 10198                       | 2818                           | 624                                     | 13640                 | 36                                                                    |
| Atlantic salmon         | 3919                        | 6418                           | 4147                                    | 14484                 | 15                                                                    |
| Ballan wrasse           | 9759                        | 3130                           | 1027                                    | 13916                 | 35                                                                    |
| Barramundi perch        | 10123                       | 3089                           | 836                                     | 14048                 | 40                                                                    |
| Blue tilapia            | 10480                       | 2910                           | 651                                     | 14041                 | 38                                                                    |
| Blunt-snouted clingfish | 10139                       | 2552                           | 549                                     | 13240                 | 33                                                                    |
| Brown trout             | 3744                        | 7066                           | 3816                                    | 14626                 | 14                                                                    |
| Burton's mouthbrooder   | 10678                       | 2836                           | 514                                     | 14028                 | 37                                                                    |
| Channel bull blenny     | 10109                       | 2678                           | 517                                     | 13304                 | 39                                                                    |
| Channel catfish         | 10868                       | 2672                           | 590                                     | 14130                 | 35                                                                    |
| Climbing perch          | 10638                       | 2979                           | 540                                     | 14157                 | 40                                                                    |
| Cod                     | 10411                       | 2323                           | 379                                     | 13113                 | 35                                                                    |
| Common carp             | 3530                        | 5699                           | 4772                                    | 14001                 | 12                                                                    |
| Denticle herring        | 9916                        | 3182                           | 798                                     | 13896                 | 34                                                                    |
| Eastern happy           | 10464                       | 2865                           | 713                                     | 14042                 | 40                                                                    |
| Electric eel            | 10526                       | 2973                           | 513                                     | 14012                 | 36                                                                    |
| European seabass        | 10503                       | 2861                           | 442                                     | 13806                 | 37                                                                    |
| Fugu                    | 10133                       | 2549                           | 576                                     | 13258                 | 31                                                                    |
| Gilthead seabream       | 10711                       | 2870                           | 495                                     | 14076                 | 38                                                                    |
| Greater amberjack       | 10750                       | 2957                           | 552                                     | 14259                 | 35                                                                    |
| Guppy                   | 10623                       | 2662                           | 509                                     | 13794                 | 36                                                                    |
| Huchen                  | 3797                        | 6234                           | 4510                                    | 14541                 | 12                                                                    |
| Indian glassy fish      | 10440                       | 2833                           | 556                                     | 13829                 | 40                                                                    |
| Indian medaka           | 10589                       | 2798                           | 531                                     | 13918                 | 38                                                                    |
| Japanese medaka HdrR    | 10699                       | 2557                           | 474                                     | 13730                 | 38                                                                    |
| Japanese medaka HNI     | 10528                       | 2432                           | 426                                     | 13386                 | 39                                                                    |
| Japanese medaka HSOK    | 10609                       | 2563                           | 455                                     | 13627                 | 37                                                                    |
| Jewelled blenny         | 9907                        | 2882                           | 881                                     | 13670                 | 35                                                                    |
| Large yellow croaker    | 10645                       | 2916                           | 464                                     | 14025                 | 40                                                                    |
| Live sharksucker        | 10656                       | 2761                           | 422                                     | 13839                 | 36                                                                    |
| Lyretail cichlid        | 10331                       | 2816                           | 640                                     | 13787                 | 38                                                                    |
| Makobe Island cichlid   | 10552                       | 2881                           | 537                                     | 13970                 | 37                                                                    |
| Mexican tetra           | 10464                       | 3139                           | 621                                     | 14224                 | 37                                                                    |
| Midas cichlid           | 10441                       | 2761                           | 595                                     | 13797                 | 36                                                                    |
| Mummichog               | 10489                       | 2813                           | 553                                     | 13855                 | 38                                                                    |
| Nile tilapia            | 10588                       | 2803                           | 574                                     | 13965                 | 36                                                                    |
| Northern pike           | 10447                       | 3354                           | 462                                     | 14263                 | 37                                                                    |
| Orbiculate cardinalfish | 10081                       | 2994                           | 797                                     | 13872                 | 36                                                                    |
| Pachon cavefish         | 10333                       | 2844                           | 497                                     | 13674                 | 34                                                                    |
| Pinecone soldierfish    | 10486                       | 3042                           | 553                                     | 14081                 | 41                                                                    |
| Rainbow trout           | 4274                        | 6304                           | 3445                                    | 14023                 | 16                                                                    |
| Red-bellied piranha     | 10767                       | 3201                           | 589                                     | 14557                 | 38                                                                    |
| Sailfin molly           | 10238                       | 2843                           | 780                                     | 13861                 | 37                                                                    |
| Sheepshead minnow       | 10388                       | 2800                           | 597                                     | 13785                 | 39                                                                    |
| Shortfin molly          | 10174                       | 2962                           | 780                                     | 13916                 | 39                                                                    |
| Siamese fighting fish   | 10663                       | 2637                           | 432                                     | 13732                 | 38                                                                    |

### Parental imprinting

|                      |            |           |           |             |          |
|----------------------|------------|-----------|-----------|-------------|----------|
| Stickleback          | 10384      | 2474      | 337       | 13195       | 34       |
| Swamp eel            | 10771      | 2672      | 512       | 13955       | 36       |
| Tetraodon            | 9699       | 2576      | 643       | 12918       | 32       |
| Tiger tail seahorse  | 10485      | 2519      | 512       | 13516       | 38       |
| Tongue sole          | 10473      | 2615      | 555       | 13643       | 35       |
| Turbot               | 10755      | 2757      | 340       | 13852       | 37       |
| Yellowtail amberjack | 10347      | 3084      | 735       | 14166       | 38       |
| Zebra mbuna          | 10262      | 3037      | 831       | 14130       | 39       |
| Zebrafish            | 10601      | 2942      | 552       | 14095       | 38       |
| Zig-zag eel          | 10768      | 2867      | 431       | 14066       | 38       |
|                      |            |           |           |             |          |
| <b>MAXIMAL</b>       | 10868      | 7066      | 4772      | 14626       | 41       |
| <b>MINIMAL</b>       | 3530       | 2323      | 337       | 12918       | 12       |
| <b>MEAN</b>          | 9853.78947 | 3135.2807 | 892.82456 | 13881.89474 | 34.96491 |

Parental imprinting

| Parental imprinting genes                                   |                                                             |                                           | C                   |
|-------------------------------------------------------------|-------------------------------------------------------------|-------------------------------------------|---------------------|
| Number of parental imprinting teleost orthologs remained in | Number of parental imprinting teleost orthologs remained in | Total number of parental imprinting genes | Chi2 test           |
| 7                                                           | 1                                                           | 48                                        | 2.16781931651791    |
| 5                                                           | 2                                                           | 43                                        | 1.82790798273002    |
| 20                                                          | 12                                                          | 47                                        | 0.561884391366698   |
| 7                                                           | 3                                                           | 45                                        | 1.25708265096669    |
| 5                                                           | 3                                                           | 48                                        | 3.02984136731787    |
| 8                                                           | 1                                                           | 47                                        | 0.958283980028896   |
| 7                                                           | 2                                                           | 42                                        | 0.0930015339869288  |
| 22                                                          | 11                                                          | 47                                        | 0.433033913803445   |
| 9                                                           | 1                                                           | 47                                        | 0.175350903859632   |
| 8                                                           | 0                                                           | 47                                        | 1.25991609315485    |
| 10                                                          | 3                                                           | 48                                        | 0.432028462558449   |
| 7                                                           | 0                                                           | 47                                        | 2.49787865671492    |
| 6                                                           | 0                                                           | 41                                        | 0.89362774798101    |
| 23                                                          | 14                                                          | 49                                        | 0.0135723202883893  |
| 10                                                          | 4                                                           | 48                                        | 0.00648137825067259 |
| 7                                                           | 0                                                           | 47                                        | 2.77440861277998    |
| 6                                                           | 2                                                           | 44                                        | 1.05585496673543    |
| 5                                                           | 3                                                           | 45                                        | 0.934107006146681   |
| 11                                                          | 2                                                           | 44                                        | 0.871895653983832   |
| 7                                                           | 1                                                           | 46                                        | 1.07320185619677    |
| 9                                                           | 1                                                           | 45                                        | 0.138175058156103   |
| 7                                                           | 3                                                           | 46                                        | 0.0405421597713641  |
| 15                                                          | 20                                                          | 47                                        | 0.00820767112382734 |
| 5                                                           | 3                                                           | 48                                        | 1.59463492246533    |
| 5                                                           | 4                                                           | 47                                        | 0.587584628055566   |
| 3                                                           | 5                                                           | 46                                        | 0.58679384563407    |
| 3                                                           | 3                                                           | 45                                        | 1.72252582204062    |
| 4                                                           | 4                                                           | 45                                        | 0.498274781581108   |
| 6                                                           | 4                                                           | 45                                        | 0.634860547020917   |
| 7                                                           | 0                                                           | 47                                        | 2.17772225095823    |
| 6                                                           | 2                                                           | 44                                        | 0.576815194510765   |
| 6                                                           | 2                                                           | 46                                        | 1.44287002784328    |
| 8                                                           | 2                                                           | 47                                        | 0.258819801348492   |
| 6                                                           | 3                                                           | 46                                        | 1.11609210522594    |
| 7                                                           | 2                                                           | 45                                        | 0.457103939167116   |
| 8                                                           | 1                                                           | 47                                        | 0.676589161381741   |
| 10                                                          | 0                                                           | 46                                        | 0.149711021618182   |
| 8                                                           | 1                                                           | 46                                        | 1.21326465503087    |
| 8                                                           | 3                                                           | 47                                        | 0.364431228885547   |
| 7                                                           | 2                                                           | 43                                        | 0.285783122702426   |
| 5                                                           | 2                                                           | 48                                        | 3.02573776813573    |
| 19                                                          | 10                                                          | 45                                        | 0.547423821515953   |
| 9                                                           | 1                                                           | 48                                        | 0.674580324551083   |
| 8                                                           | 1                                                           | 46                                        | 1.02937426256617    |
| 8                                                           | 0                                                           | 47                                        | 1.47014183202537    |
| 8                                                           | 1                                                           | 48                                        | 1.61775914165671    |
| 7                                                           | 1                                                           | 46                                        | 0.651559243263343   |



### Parental imprinting

|         |         |          |                   |
|---------|---------|----------|-------------------|
| 6       | 0       | 40       | 0.948025644493705 |
| 6       | 1       | 43       | 1.04345241940465  |
| 5       | 2       | 39       | 1.01268132801778  |
| 7       | 2       | 47       | 0.290012781977809 |
| 7       | 2       | 44       | 0.190759310728167 |
| 7       | 0       | 44       | 1.05406939973635  |
| 7       | 2       | 47       | 1.45588817316256  |
| 8       | 0       | 47       | 2.53398985695549  |
| 8       | 0       | 46       | 1.35021591208845  |
| 7       | 1       | 46       | 0.939691575718443 |
|         |         |          |                   |
| 23      | 20      | 49       | 3.02984           |
| 3       | 0       | 39       | 0.00648           |
| 8.07018 | 2.73684 | 45.77193 | 0.99444           |

Parental imprinting

| omparison between singleton. duplicate. triplicate and more copies |                                              |                             |                                                        |
|--------------------------------------------------------------------|----------------------------------------------|-----------------------------|--------------------------------------------------------|
| Chi2 test p-value                                                  | Chi2 test FDR (Benjamini-Hochberg procedure) | Hypergeometric test p-value | Hypergeometric test FDR (Benjamini-Hochberg procedure) |
| 0.140925948344524                                                  | 0.644340954762652                            | 0.955257133221294           | 0.977568316880199                                      |
| 0.176374844100671                                                  | 0.644340954762652                            | 0.943090901659366           | 0.977568316880199                                      |
| 0.453501987548966                                                  | 0.654605433377509                            | 0.821149626567003           | 0.977568316880199                                      |
| 0.262204028175485                                                  | 0.644340954762652                            | 0.903912791062508           | 0.977568316880199                                      |
| 0.0817460083949506                                                 | 0.644340954762652                            | 0.976652019033423           | 0.977568316880199                                      |
| 0.32761960678852                                                   | 0.644340954762652                            | 0.87696317803767            | 0.977568316880199                                      |
| 0.760395453111118                                                  | 0.817783789194976                            | 0.677908793033684           | 0.977568316880199                                      |
| 0.51050399575099                                                   | 0.661971167959833                            | 0.798201872937035           | 0.977568316880199                                      |
| 0.675399424699246                                                  | 0.769955344157141                            | 0.715742341253019           | 0.977568316880199                                      |
| 0.261666973605296                                                  | 0.644340954762652                            | 0.906801386400846           | 0.977568316880199                                      |
| 0.510995287547941                                                  | 0.661971167959833                            | 0.305130226439542           | 0.977568316880199                                      |
| 0.113999761623482                                                  | 0.644340954762652                            | 0.966445334353108           | 0.977568316880199                                      |
| 0.344496112381048                                                  | 0.644340954762652                            | 0.876163779905064           | 0.977568316880199                                      |
| 0.907256047031207                                                  | 0.935834023177937                            | 0.529996518795498           | 0.977568316880199                                      |
| 0.935834023177937                                                  | 0.935834023177937                            | 0.52246887814117            | 0.977568316880199                                      |
| 0.0957820280380141                                                 | 0.644340954762652                            | 0.972841898421625           | 0.977568316880199                                      |
| 0.304162478404626                                                  | 0.644340954762652                            | 0.888929778844751           | 0.977568316880199                                      |
| 0.333797991174305                                                  | 0.644340954762652                            | 0.876050192897145           | 0.977568316880199                                      |
| 0.350431045572671                                                  | 0.644340954762652                            | 0.220448902183295           | 0.977568316880199                                      |
| 0.300223340694318                                                  | 0.644340954762652                            | 0.890464590598548           | 0.977568316880199                                      |
| 0.710102033877591                                                  | 0.77838107559659                             | 0.699791527988626           | 0.977568316880199                                      |
| 0.840424253853623                                                  | 0.887114490178824                            | 0.636418344382686           | 0.977568316880199                                      |
| 0.927813452927157                                                  | 0.935834023177937                            | 0.540566437116734           | 0.977568316880199                                      |
| 0.206665180631731                                                  | 0.644340954762652                            | 0.92946446276751            | 0.977568316880199                                      |
| 0.443354650907187                                                  | 0.654605433377509                            | 0.825378511102819           | 0.977568316880199                                      |
| 0.443661603667878                                                  | 0.654605433377509                            | 0.827044317640085           | 0.977568316880199                                      |
| 0.189368240632462                                                  | 0.644340954762652                            | 0.939971071860061           | 0.977568316880199                                      |
| 0.480259150580241                                                  | 0.661971167959833                            | 0.8105351216456             | 0.977568316880199                                      |
| 0.425578018375252                                                  | 0.654605433377509                            | 0.832467554416157           | 0.977568316880199                                      |
| 0.140021555814936                                                  | 0.644340954762652                            | 0.956952948923234           | 0.977568316880199                                      |
| 0.447563377613561                                                  | 0.654605433377509                            | 0.825601881717692           | 0.977568316880199                                      |
| 0.229675471658379                                                  | 0.644340954762652                            | 0.920118766135543           | 0.977568316880199                                      |
| 0.610932128750294                                                  | 0.725481902890975                            | 0.746342142838567           | 0.977568316880199                                      |
| 0.29076148354252                                                   | 0.644340954762652                            | 0.892966671281818           | 0.977568316880199                                      |
| 0.498980570368659                                                  | 0.661971167959833                            | 0.800323737955721           | 0.977568316880199                                      |
| 0.410763714242623                                                  | 0.654605433377509                            | 0.84011592531749            | 0.977568316880199                                      |
| 0.69881166945096                                                   | 0.77838107559659                             | 0.704868334360213           | 0.977568316880199                                      |
| 0.270686527802615                                                  | 0.644340954762652                            | 0.901511023165936           | 0.977568316880199                                      |
| 0.546055484693868                                                  | 0.691670280612232                            | 0.775733066107286           | 0.977568316880199                                      |
| 0.592935564166668                                                  | 0.719092067180853                            | 0.757192802973317           | 0.977568316880199                                      |
| 0.0819530397653641                                                 | 0.644340954762652                            | 0.977568316880199           | 0.977568316880199                                      |
| 0.459372233949129                                                  | 0.654605433377509                            | 0.817877385042016           | 0.977568316880199                                      |
| 0.411459240677466                                                  | 0.654605433377509                            | 0.838292761124089           | 0.977568316880199                                      |
| 0.31030568070788                                                   | 0.644340954762652                            | 0.884573287417485           | 0.977568316880199                                      |
| 0.225323317138451                                                  | 0.644340954762652                            | 0.921880265759968           | 0.977568316880199                                      |
| 0.203404526576614                                                  | 0.644340954762652                            | 0.92939124460366            | 0.977568316880199                                      |
| 0.419555760475738                                                  | 0.654605433377509                            | 0.83793982459297            | 0.977568316880199                                      |

Parental imprinting

|                   |                   |                   |                   |
|-------------------|-------------------|-------------------|-------------------|
| 0.330222362168513 | 0.644340954762652 | 0.882391184023231 | 0.977568316880199 |
| 0.307019887699219 | 0.644340954762652 | 0.88966933324267  | 0.977568316880199 |
| 0.314261331664772 | 0.644340954762652 | 0.886970449014357 | 0.977568316880199 |
| 0.590212339400406 | 0.719092067180853 | 0.757409644833045 | 0.977568316880199 |
| 0.6622853998245   | 0.769955344157141 | 0.724148168991361 | 0.977568316880199 |
| 0.304571725611271 | 0.644340954762652 | 0.890643225663272 | 0.977568316880199 |
| 0.227585490213454 | 0.644340954762652 | 0.91949956334093  | 0.977568316880199 |
| 0.111418169974796 | 0.644340954762652 | 0.966160463046428 | 0.977568316880199 |
| 0.245240374315873 | 0.644340954762652 | 0.91368190937084  | 0.977568316880199 |
| 0.332357173110182 | 0.644340954762652 | 0.876576965710438 | 0.977568316880199 |
|                   |                   |                   |                   |
| 0.93583           | 0.93583           | 0.97757           | 0.97757           |
| 0.08175           | 0.64434           | 0.22045           | 0.97757           |
| 0.39979           | 0.68383           | 0.81934           | 0.97757           |

Parental imprinting

| <b>Comparison between tripli or more copies and dupli or less copies</b> |                                                               |
|--------------------------------------------------------------------------|---------------------------------------------------------------|
| <b>Hypergeometric test p-value</b>                                       | <b>Hypergeometric test FDR (Benjamini-Hochberg procedure)</b> |
| 0.919697883721407                                                        | 1                                                             |
| 0.591671556911165                                                        | 1                                                             |
| 0.731618535243889                                                        | 1                                                             |
| 0.655280844788823                                                        | 1                                                             |
| 0.55040331717341                                                         | 1                                                             |
| 0.89300832429622                                                         | 1                                                             |
| 0.524685862083034                                                        | 1                                                             |
| 0.714964489765281                                                        | 1                                                             |
| 0.82750852910998                                                         | 1                                                             |
| 1                                                                        | 1                                                             |
| 0.324438851863797                                                        | 1                                                             |
| 1                                                                        | 1                                                             |
| 1                                                                        | 1                                                             |
| 0.832830330656687                                                        | 1                                                             |
| 0.296585625240612                                                        | 1                                                             |
| 1                                                                        | 1                                                             |
| 0.482545496528408                                                        | 1                                                             |
| 0.173894245758489                                                        | 1                                                             |
| 0.575679270258282                                                        | 1                                                             |
| 0.807846579527661                                                        | 1                                                             |
| 0.831273389308077                                                        | 1                                                             |
| 0.240387740607254                                                        | 1                                                             |
| 0.0626763623704843                                                       | 1                                                             |
| 0.303860354974478                                                        | 1                                                             |
| 0.103473462396853                                                        | 1                                                             |
| 0.020560745644604                                                        | 1                                                             |
| 0.171765715980766                                                        | 1                                                             |
| 0.0624317485962584                                                       | 1                                                             |
| 0.329504317689732                                                        | 1                                                             |
| 1                                                                        | 1                                                             |
| 0.389906623547002                                                        | 1                                                             |
| 0.636665677356488                                                        | 1                                                             |
| 0.544224894048767                                                        | 1                                                             |
| 0.325558848240955                                                        | 1                                                             |
| 0.583885952588294                                                        | 1                                                             |
| 0.853047315048397                                                        | 1                                                             |
| 1                                                                        | 1                                                             |
| 0.780655009805815                                                        | 1                                                             |
| 0.511810362172052                                                        | 1                                                             |
| 0.466686896846573                                                        | 1                                                             |
| 0.567497718467925                                                        | 1                                                             |
| 0.69752313275528                                                         | 1                                                             |
| 0.862731684825785                                                        | 1                                                             |
| 0.930658132592561                                                        | 1                                                             |
| 1                                                                        | 1                                                             |
| 0.937562813354077                                                        | 1                                                             |
| 0.770725733121052                                                        | 1                                                             |

## Parental imprinting

|                   |   |
|-------------------|---|
| 1                 | 1 |
| 0.800068676788555 | 1 |
| 0.584939098783418 | 1 |
| 0.536228923097732 | 1 |
| 0.53943407032701  | 1 |
| 1                 | 1 |
| 0.708496608567602 | 1 |
| 1                 | 1 |
| 1                 | 1 |
| 0.761616606692177 | 1 |
|                   |   |
| 1                 | 1 |
| 0.02056           | 1 |
| 0.64594           | 1 |
